# Supplementary material for: Ferrovalley and topological phase transition behavior in monolayer Ru(OH)2
Source: Royal Society of Chemistry journal article supplement (doi:10.1039/d3tc02877a), 2023-01-01
Supplement: d3tc02877a1.pdf [file d3tc02877a1.pdf]

Figure S3(a) shows the spin-resolved band structure of monolayer Ru(OH)<sub>2</sub> without ferromagnetism under the SOC effect. It is found that the Fermi level crosses the energy band, which results in a metal characteristic for present monolayer Ru(OH)<sub>2</sub>. Moreover, the degeneracy of K and K' valleys for the same spin (red and blue) is still broken owing to the lack of space inversion symmetry [1, 2]. However, when the up and down spins are considered simultaneously, K and K' valleys are energetically degenerate due to the time reversal symmetry of the monolayer Ru(OH)<sub>2</sub> [3, 4]. Figures S3(b) – S3(f) show the d-orbitals projected band structures of Ru atoms in the Ru(OH)<sub>2</sub> monolayer. The valley states at the K and K' points are mainly contributed by the occupied d<sub>xy</sub> and d<sub>x<sup>2</sup>-y<sup>2</sup></sub> orbitals of Ru atom, as shown in Figures S3(b) and S3(c). The d<sub>z<sup>2</sup></sub> orbitals of Ru atoms are mainly distributed near the K and K' points of the conduction band, as displayed in Figure S3(d). Comparatively, the electronic states of d<sub>xz</sub> and d<sub>yz</sub> orbitals of the Ru atoms far away from the Fermi level, so it has little contribution to the valley electron state, as shown in Figures S3(e) and S3(f).

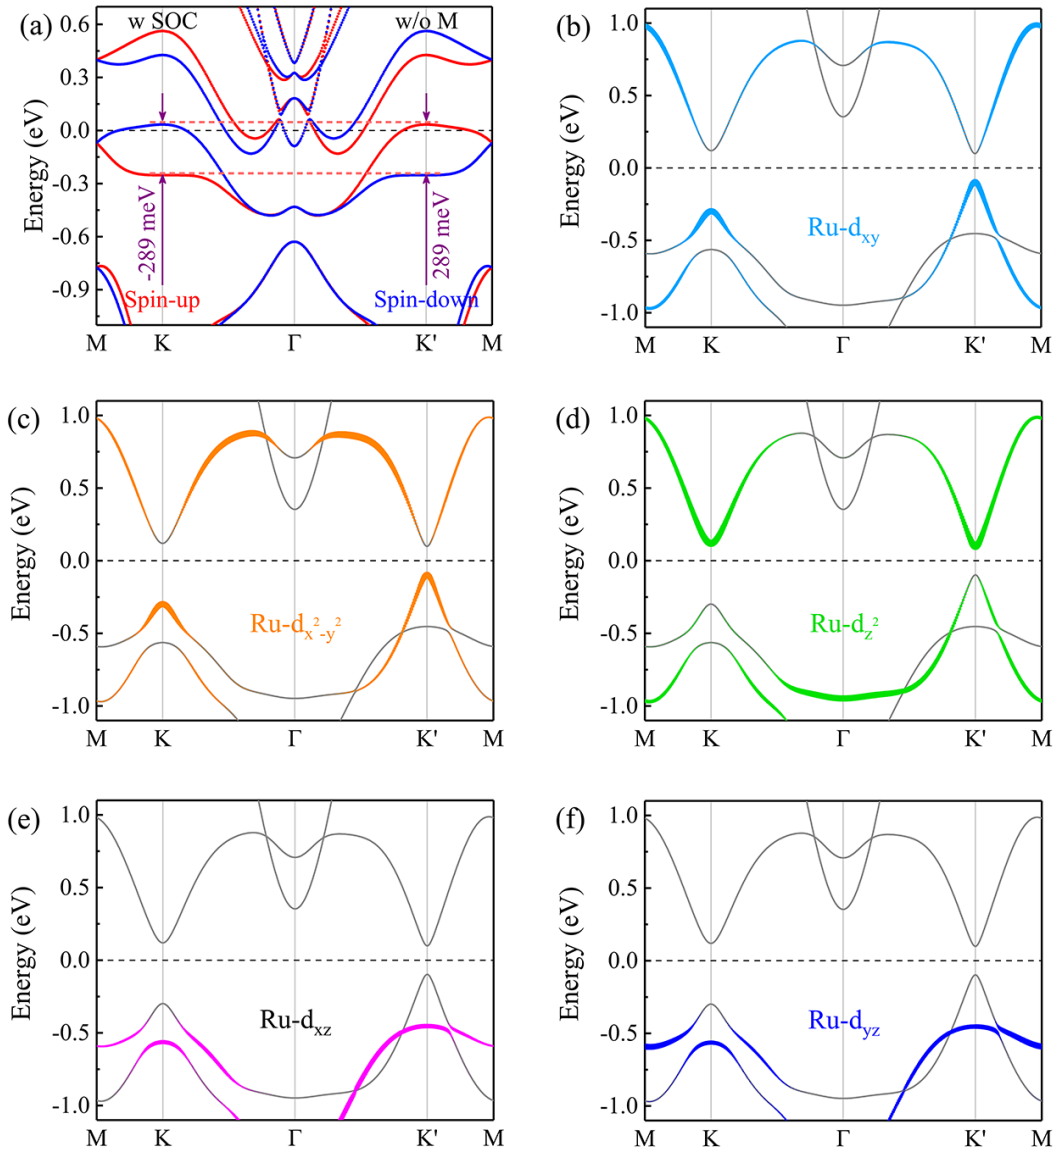

Figure S3. (a) Spin-resolved band structure of monolayer Ru(OH)<sub>2</sub> without ferromagnetism under the SOC effect. (b)-(f) Projected band structures of Ru-d orbitals for monolayer Ru(OH)<sub>2</sub>.

Figure S4 shows the  $T_C$  and  $T_{BKT}$  of monolayer  $\text{Ru}(\text{OH})_2$  with different biaxial strains. As shown in Figure S4(a), under 0% ~ -3% strains, the  $T_C$  of monolayer  $\text{Ru}(\text{OH})_2$  increases with the increasing of compressive strain. The  $T_C$  of monolayer  $\text{Ru}(\text{OH})_2$  reaches 623 K at -3% compressive strain. Comparatively, with 0% ~ 3% strains, the  $T_C$  of monolayer  $\text{Ru}(\text{OH})_2$  decreases with the enlarging of tensile strain. At 3% strain, the  $T_C$  of monolayer  $\text{Ru}(\text{OH})_2$  becomes 64 K. Comparatively, as the strain changes from -3% to 3%, the  $T_{BKT}$  of monolayer  $\text{Ru}(\text{OH})_2$  decreases from 742 to 76 K, as shown in Figure S4(b).

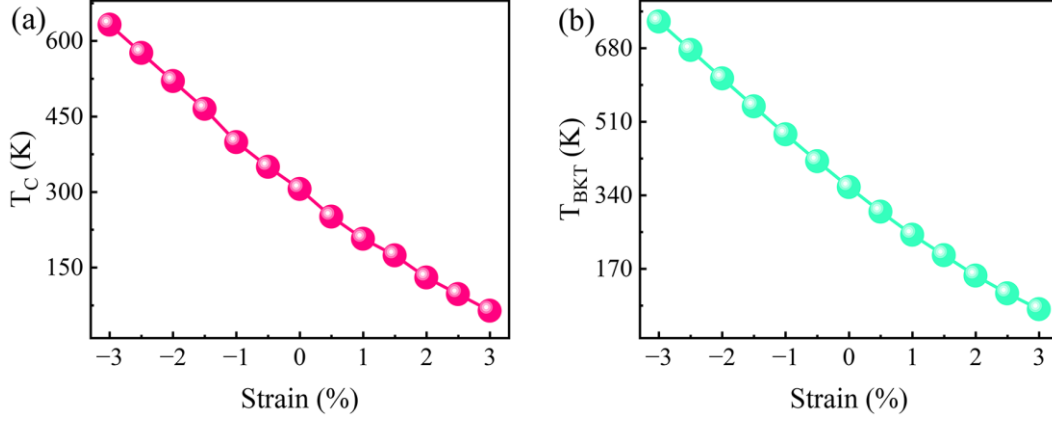

Figure S4. The  $T_C$  and  $T_{BKT}$  of monolayer  $\text{Ru}(\text{OH})_2$  with different biaxial strains.

Figure S5 shows the SOC band structures of monolayer  $\text{Ru}(\text{OH})_2$  at -1, -2 and -3% compressive strains, respectively. It could be seen that monolayer  $\text{Ru}(\text{OH})_2$  is always a FV semiconductor during the whole compressive strain progress. Moreover, the valley polarizations are -198 meV, -196 meV and -193 meV for monolayer  $\text{Ru}(\text{OH})_2$  at -1, -2 and -3% compressive strains, respectively.

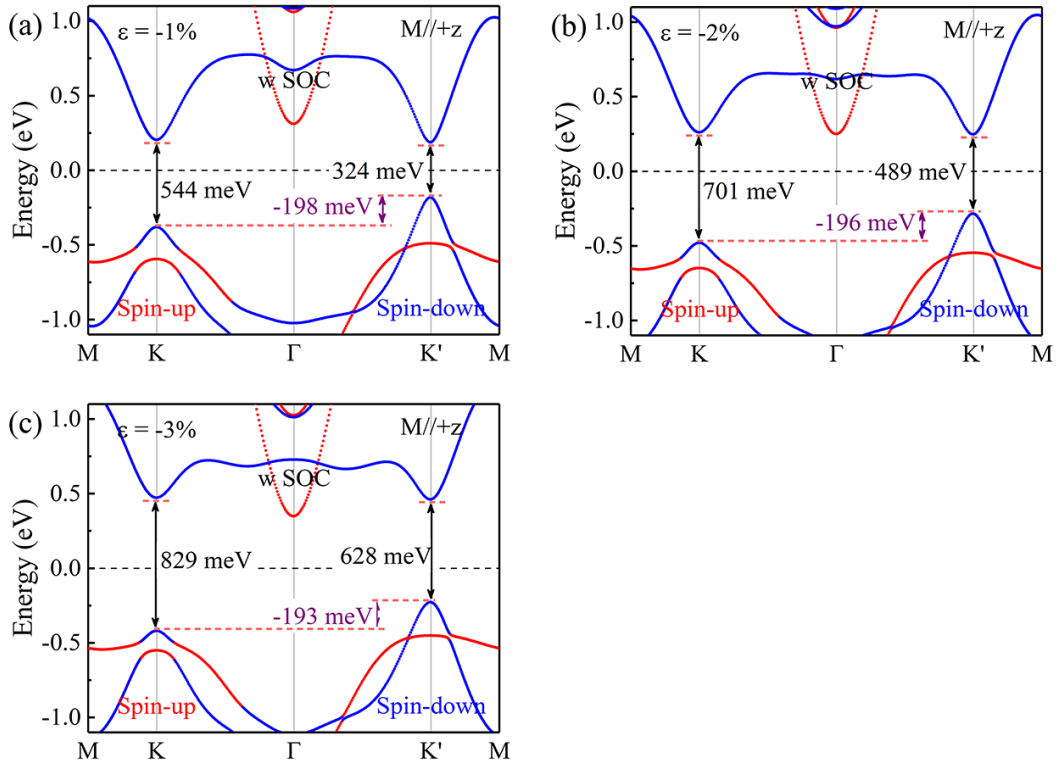

Figure S5. Spin-resolved band structures of monolayer  $\text{Ru}(\text{OH})_2$  at (a) -1, (b) -2 and (c) -3% compressive strains under the SOC effect, respectively.

As observed in Figure S6(a), the Fermi energy level crosses the K' valley of the spin-down channel in monolayer Ru(OH)<sub>2</sub> with doping 0.05 holes/f.u., which means carriers with 100% spin-down state are dominated by the K' valley. This is a typical characteristic of half metal. As the magnetization of the Ru atom reversing to the -z direction, carriers with 100% spin-up state are dominated by the K valley, as shown in figure S6(b). Such special half-metallic materials with a metallic character in one spin channel and a semiconducting nature in the other could provide completely spin-polarized current for highly efficient spintronics devices [5, 6]. The calculated Berry curvature further indicates valley contrasting characteristic, as indicated in Figure S6(c). As shown in Figure S6(d), the Fermi level lies between the K and K' valleys, as denoted with two vertical dashed lines (green region), which also means a fully spin- and valley-polarized Hall conductivity is generated [7]. In the first-principles calculations, carrier doping is simulated by removing or adding electrons from the system and using a homogeneous background charge to maintain charge neutrality [5, 6].

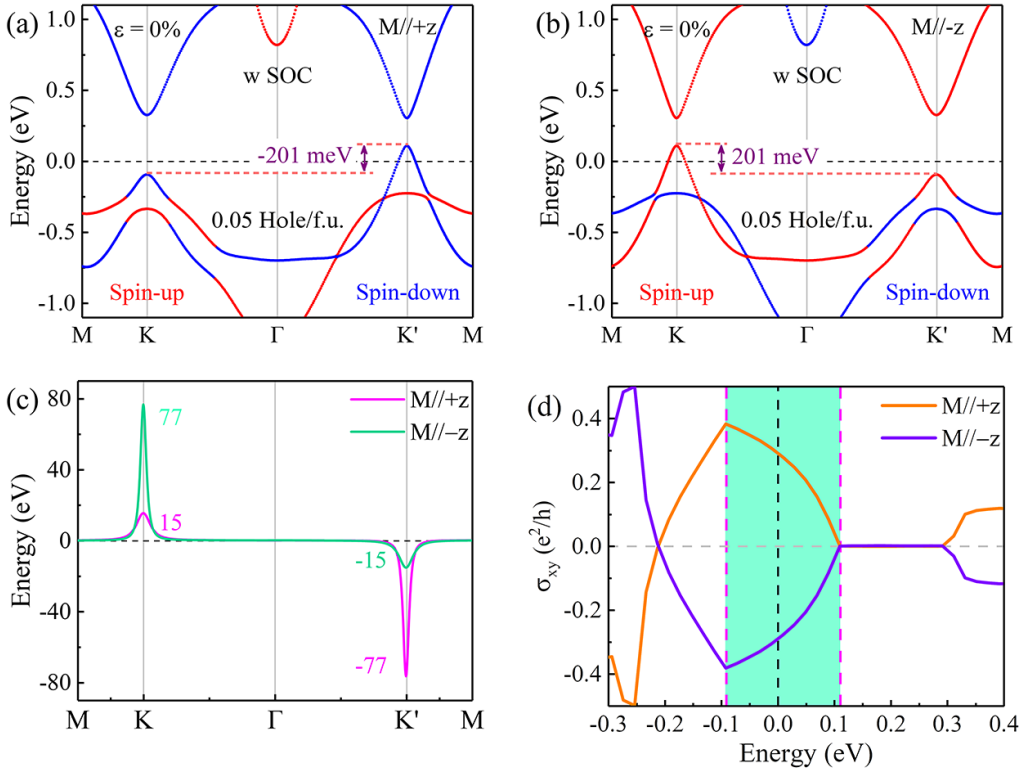

Figure S6. Spin-resolved band structures under the SOC effect of monolayer Ru (OH)<sub>2</sub> with doping 0.05 holes/f.u.. for the magnetization of the Ru atom along the (a) +z and (b) -z directions, respectively. (c) Berry curvature along the high symmetry line for monolayer Ru(OH)<sub>2</sub> with doping 0.05 holes/f.u.. (d) Anomalous Hall conductivity  $\sigma_{xy}$  as a function of Fermi energy for monolayer Ru(OH)<sub>2</sub> with doping 0.05 holes/f.u.. The two vertical dashed lines (green region) denote the two valley extrema.

As observed in Figure S7(a), with doping 0.05 electrons/f.u., the Fermi energy level crosses the K valley of the spin-down channel in monolayer Ru(OH)<sub>2</sub> under 3% tensile strain. Therefore, carriers with 100% spin-down state are dominated by the K valley. As the magnetization of the Ru atom reversing to the -z direction, carriers with 100% spin-up state are dominated by the K' valley, as shown in figure S7(b). The calculated Berry curvature further indicates valley contrasting characteristic, as indicated in Figure S7(c). As drawn in Figure S7(d), the Fermi level lies between the K and K' valleys, as denoted with two vertical dashed lines (green region), which also means a fully spin- and valley-polarized Hall conductivity is generated.

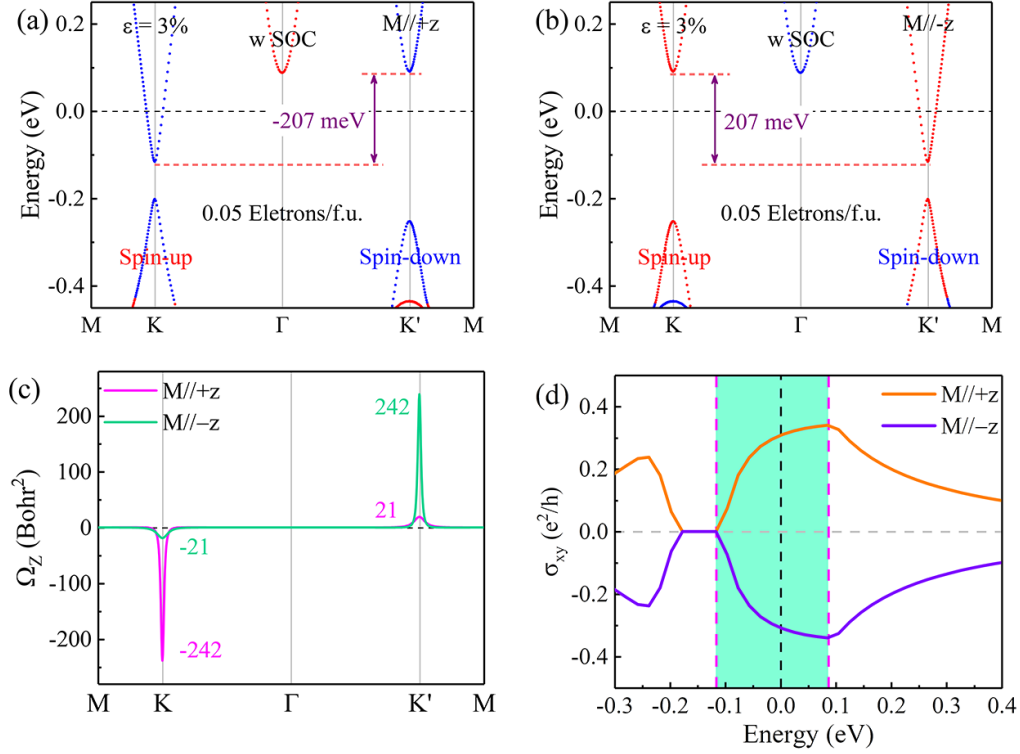

Figure S7. Spin-resolved band structures with SOC effect of monolayer Ru(OH)<sub>2</sub> under 3% tensile strain with doping 0.05 electrons/f.u.. for the magnetization of the Ru atom along the (a) +z and (b) -z directions, respectively. (c) Berry curvature along the high symmetry line for monolayer Ru(OH)<sub>2</sub> with doping 0.05 electrons/f.u.. (d) Calculated anomalous Hall conductivity  $\sigma_{xy}$  as a function of Fermi energy for monolayer Ru(OH)<sub>2</sub> with doping 0.05 electrons/f.u.. The two vertical dashed lines (green region) denote the two valley extrema.

At the last, the crystal structure of monolayer Ru(OH)<sub>2</sub> is listed so that our calculated results can be replicated by others, as shown in Figure S8.

```

Ru(OH)2
1. 0000000000000000
   3. 2845963898137049   0. 0000000000000000   0. 0000000000000000
  -1. 6422981949068525   2. 8445439147573222   0. 0000000000000000
   0. 0000000000000000   0. 0000000000000000   21. 4142858976110801
   Ru    0    H
   1     2     2

Direct
0. 0000000000000000   0. 0000000000000000   0. 5000000000000000
0. 3333333333333357   0. 6666666666666643   0. 5609159405585774
0. 3333333333333357   0. 6666666666666643   0. 4390840594414225
0. 3333333333333357   0. 6666666666666643   0. 6062190847128863
0. 3333333333333357   0. 6666666666666643   0. 3937809152871137

```

Figure S8. The crystal structure of monolayer Ru(OH)<sub>2</sub>.

## References

- [1] W.-Y. Tong, S.-J. Gong, X. Wan, and C.-G. Duan, Concepts of ferrovalley material and anomalous valley Hall effect, *Nature Communications* **7**, 13612 (2016).
- [2] K. Sheng, Q. Chen, H.-K. Yuan, and Z.-Y. Wang, Monolayer CeI<sub>2</sub>: an intrinsic room-temperature ferrovalley semiconductor, *Physicals Review B* **105**, 075304 (2022).
- [3] S.-D. Guo, J.-X. Zhu, W.-Q. Mu, and B.-G. Liu, Possible way to achieve anomalous valley Hall effect by piezoelectric effect in a GdCl<sub>2</sub> monolayer, *Physicals Review B* **104**, 224428 (2021).
- [4] Y. Wu, J.i Tong, L. Deng, F. Luo, F. Tian, G. Qin, and X. Zhang, Realizing spontaneous valley polarization and topological phase transitions in monolayer ScX<sub>2</sub> (X = Cl, Br, I), *Acta Materialia* **246**, 118731 (2023).
- [5] X. Li, X. Wu, and J. Yang, Half-Metallicity in MnPSe<sub>3</sub> Exfoliated Nanosheet with Carrier Doping, *Journal of the American Chemical Society* **136**, 11065 (2014).
- [6] Y. Chen, Q. Fan, Y. Liu, and G. Yao, Electrically tunable magnetism and unique intralayer charge transfer in Janus monolayer MnSSe for spintronics applications, *Physicals Review B* **105**, 195410 (2022).
- [7] H.-X. Cheng, J. Zhou, W. Ji, Y.-N. Zhang, and Y.-P. Feng, Two-dimensional intrinsic ferrovalley GdI<sub>2</sub> with large valley polarization, *Physicals Review B* **103**, 125121 (2021).
